# Supplementary material for: Lentiviral vector delivery of short hairpin RNA to NgR1 promotes nerve regeneration and locomotor recovery in injured rat spinal cord
Source: PubMed Central journal article supplement (PMC5882972; doi:10.1038/s41598-018-23751-2), 2018-04-03
Supplement: 41598_2018_23751_MOESM1_ESM.pdf [file 41598_2018_23751_MOESM1_ESM.pdf]

**Title:** Lentiviral vector delivery of short hairpin RNA to NgR1 promotes nerve regeneration and locomotor recovery in injured rat spinal cord.

**Author Names:** Xiaoyang Zhao, Zhiming Peng, Lingli Long, Ningning Chen, Haichong Zheng, David YB Deng\*, Yong Wan\*

## SUPPLEMENTAL INFORMATION

### 1. Blast Results

#### (1) Blast of control RNAi

Rattus norvegicus vav guanine nucleotide exchange factor 3 (Vav3), transcript variant X1, mRNA

Sequence ID: XM\_017590775.1 Length: 5116 Number of Matches: 1

Related Information

Gene-associated gene details

Range 1: 638 to 651 GenBankGraphicsNext MatchPrevious Match

Alignment statistics for match #1

| Score         | Expect | Identities     | Gaps     | Strand     |
|---------------|--------|----------------|----------|------------|
| 28.2 bits(14) | 3.3    | 14/14(100%)    | 0/14(0%) | Plus/Minus |
| Query         | 4      | TCCGAACGTGTCAC | 17       |            |
|               |        |                |          |            |
| Sbjct         | 651    | TCCGAACGTGTCAC | 638      |            |

#### (2) Blast of NgR1 RNAi

Rattus norvegicus NOGO-66 receptor (NgR) mRNA, complete cds

Sequence ID: AF462390.1 Length: 1422 Number of Matches: 1

Related Information

UniGene-clustered expressed sequence tags

Map Viewer-aligned genomic context

Range 1: 195 to 213 GenBankGraphicsNext MatchPrevious Match

Alignment statistics for match #1

| Score         | Expect | Identities          | Gaps     | Strand    |
|---------------|--------|---------------------|----------|-----------|
| 38.2 bits(19) | 1.1    | 19/19(100%)         | 0/19(0%) | Plus/Plus |
| Query         | 1      | CGGCAACCGAATCTCTTAC | 19       |           |
|               |        |                     |          |           |
| Sbjct         | 195    | CGGCAACCGAATCTCTTAC | 213      |           |

## 2. Lentiviral vector structure and detection NgR1 and NF200 in the injured area

### Fig.S1

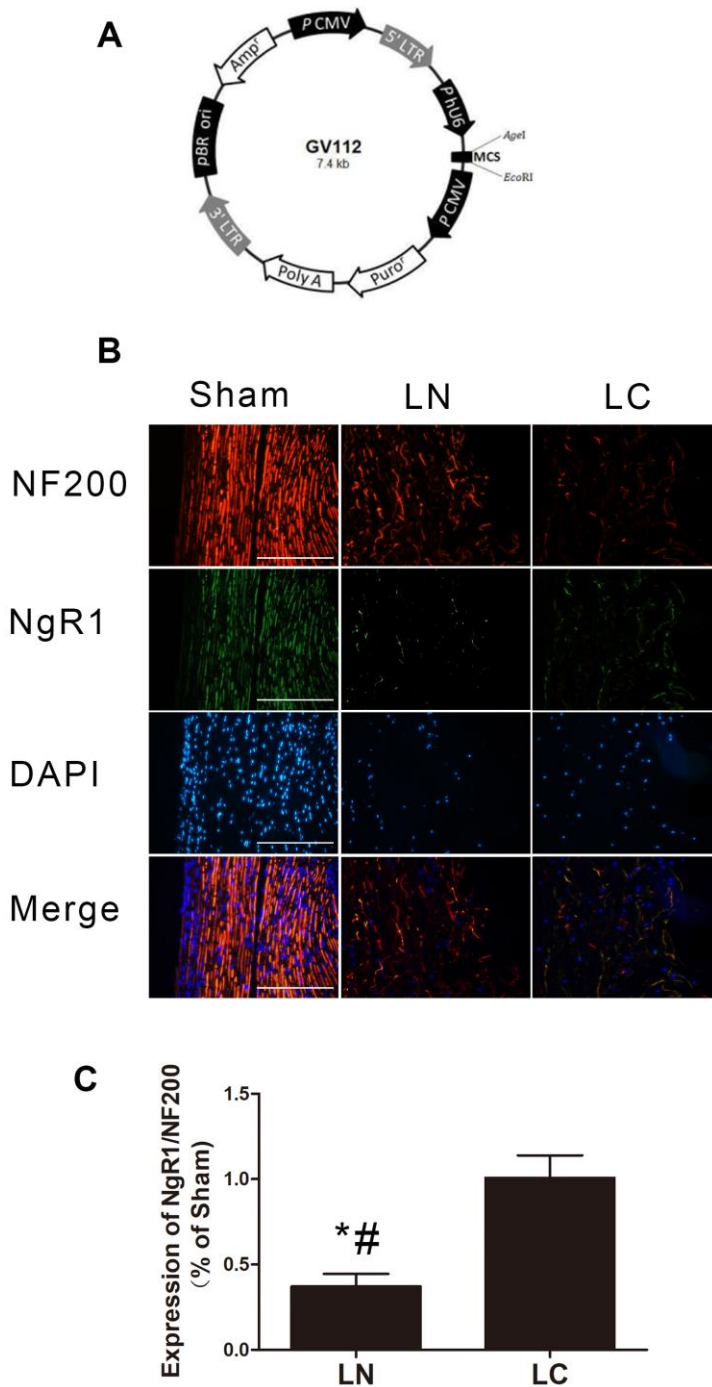

**Figure S1:** Lentiviral vector structure and detection NgR1 and NF200 in the injured area. A: Structure of pGV112. B: Immunofluorescent showing the NgR1 and neural fiber maker NF200 in lesion site at each group. C: Bars represented the ratios of

NgR1/NF200 expression. Note that NF200+ axons in the spinal cord normally express  
NgR1 and NgR1 expression was decreased in NF200 positive cell after treated LV-  
NgR1 shRNA. Bar=100 $\mu$ m. \*#P<0.01
